# Supplementary material for: Nuclear receptor corepressor 1 represses cardiac hypertrophy
Source: PubMed Central journal article supplement (PMC6835202; doi:10.15252/emmm.201809127), 2019-09-18
Supplement: EMMM-11-e9127-s001.pdf [file EMMM-11-e9127-s001.pdf]

# Table of Content

## **Nuclear Receptor Corepressor 1 Represses Cardiac Hypertrophy**

**Running Title:** NCoR1 represses cardiac hypertrophy

Chao Li†<sup>1,2,3</sup>, Xue-Nan Sun†<sup>1,2,4</sup>, Bo-Yan Chen†<sup>1,2</sup>, Meng-Ru Zeng†<sup>1,2,4</sup>, Lin-Juan Du<sup>1,2,4</sup>, Ting Liu<sup>1,2</sup>, Hui-Hui Gu<sup>5</sup>, Yuan Liu<sup>1,2,4</sup>, Yu-Lin Li<sup>1,2</sup>, Lu-Jun Zhou<sup>1,2</sup>, Xiao-Jun Zheng<sup>1,2,4</sup>, Yu-Yao Zhang<sup>1,2,4</sup>, Wu-Chang Zhang<sup>1,2</sup>, Yan Liu<sup>1,2</sup>, Chaoji Shi<sup>1,2</sup>, Shuai Shao<sup>6</sup>, Xue-Rui Shi<sup>7</sup>, Yi Yi<sup>7</sup>, Xu Liu<sup>7</sup>, Jun Wang<sup>5</sup>, Johan Auwerx<sup>8</sup>, Zhao V. Wang<sup>3</sup>, Feng Jia\*<sup>6</sup>, Ruo-Gu Li\*<sup>7</sup>, Sheng-Zhong Duan\*<sup>1,2</sup>

| <b>Appendix</b>    | <b>Page</b> |
|--------------------|-------------|
| Appendix Figure S1 | 2           |
| Appendix Figure S2 | 3           |
| Appendix Figure S3 | 4           |
| Appendix Table S1  | 5           |
| Appendix Table S2  | 6           |
| Appendix Table S3  | 7           |
| Appendix Table S4  | 8           |
| Appendix Table S5  | 9           |

## Appendix Figure S1

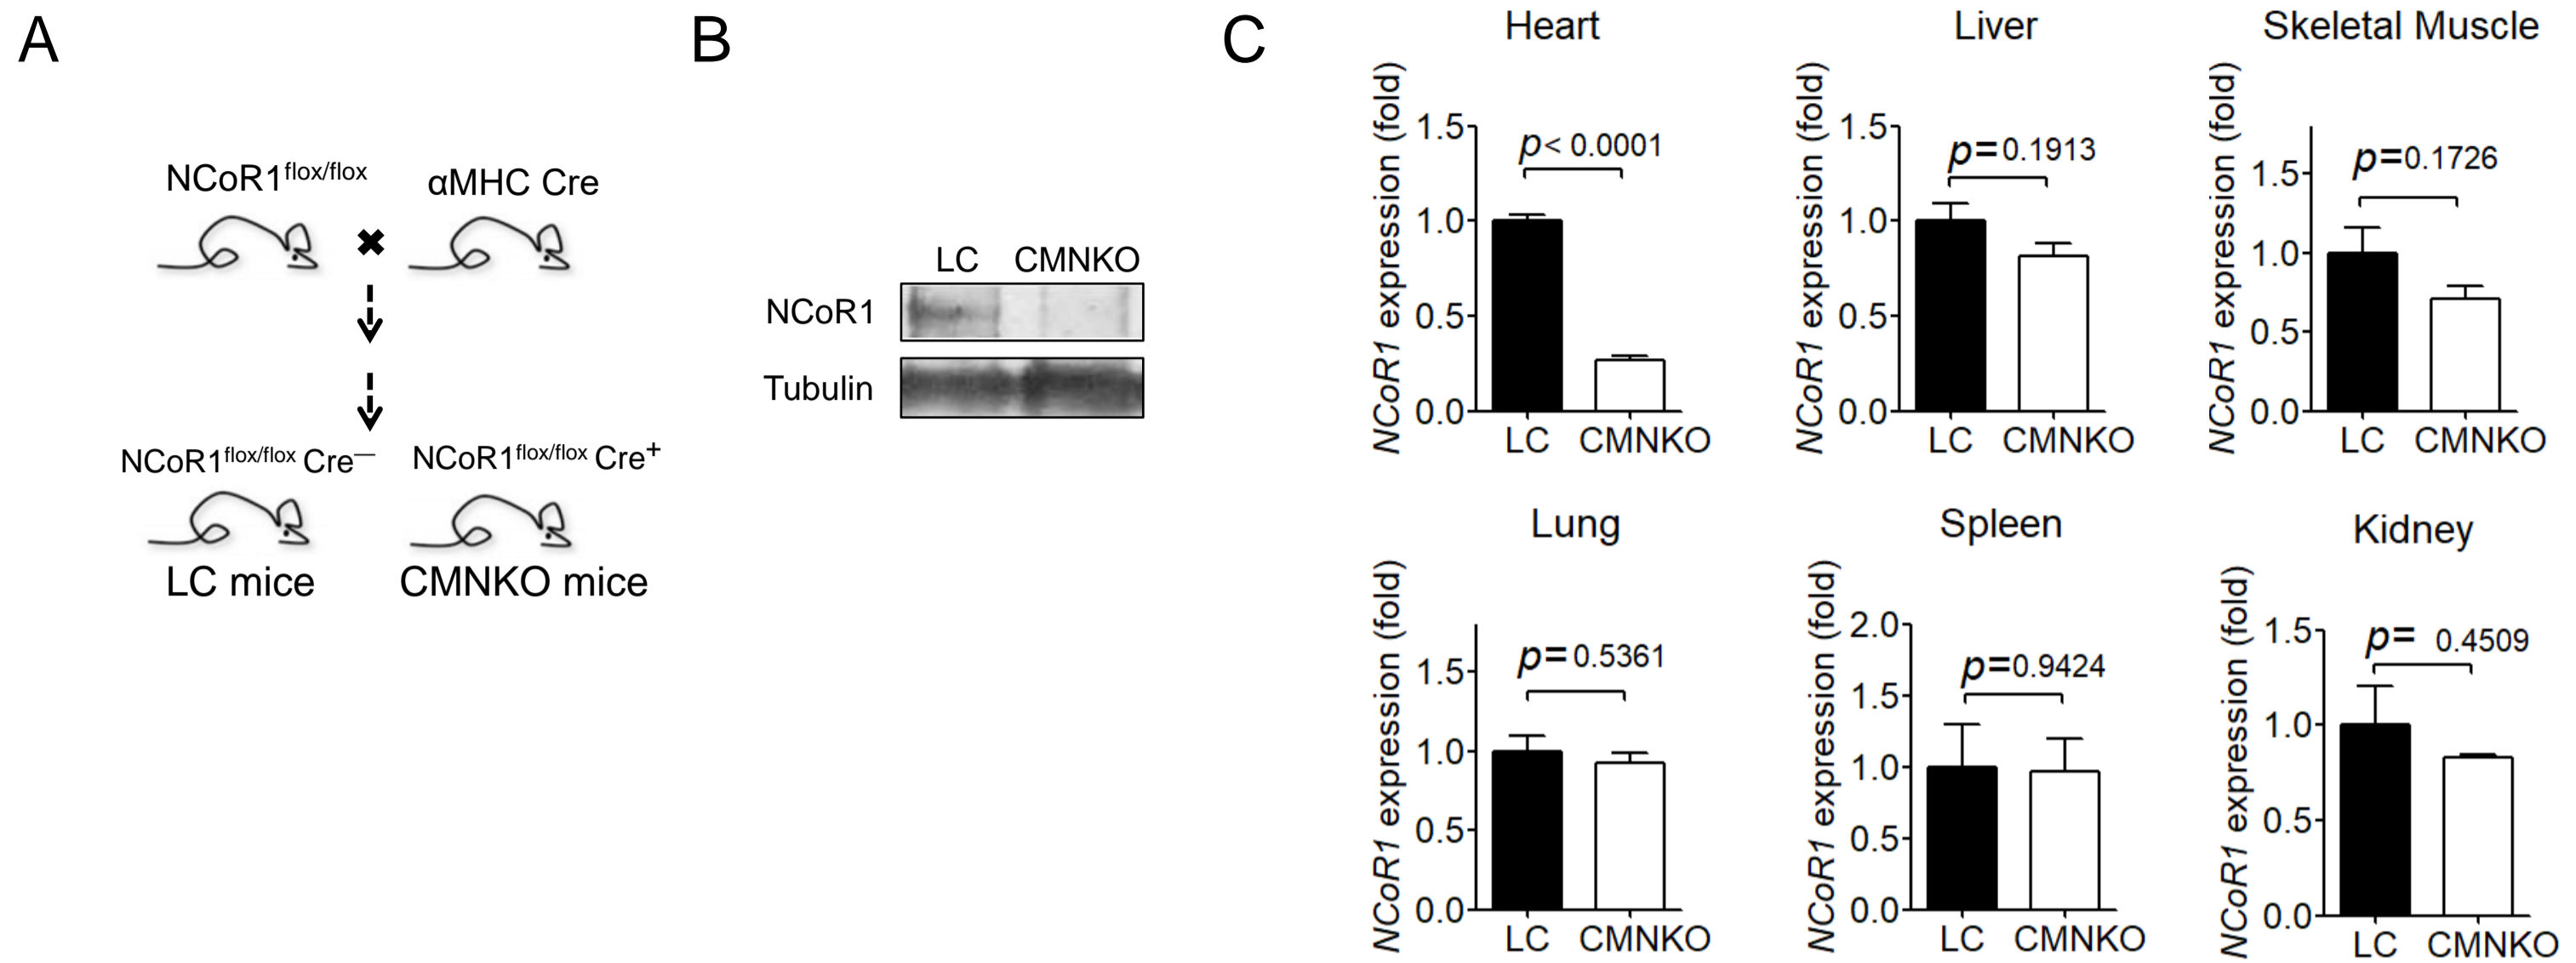

**Appendix Figure S1. Generation of cardiomyocyte-specific NCoR1 knockout mice. (A)** Schematic illustration of the strategy to generate cardiomyocyte-specific NCoR1 knockout (CMNKO) mice. **(B)** Western blotting analysis of NCoR1 in ventricular samples of littermate control (LC) or CMNKO mice. **(C)** QRT-PCR analysis of NCoR1 in different tissues from LC or CMNKO mice.  $n=8:7$  for Heart,  $n=3:3$  for other tissues. Student's t test was used for statistical analysis.

## Appendix Figure S2

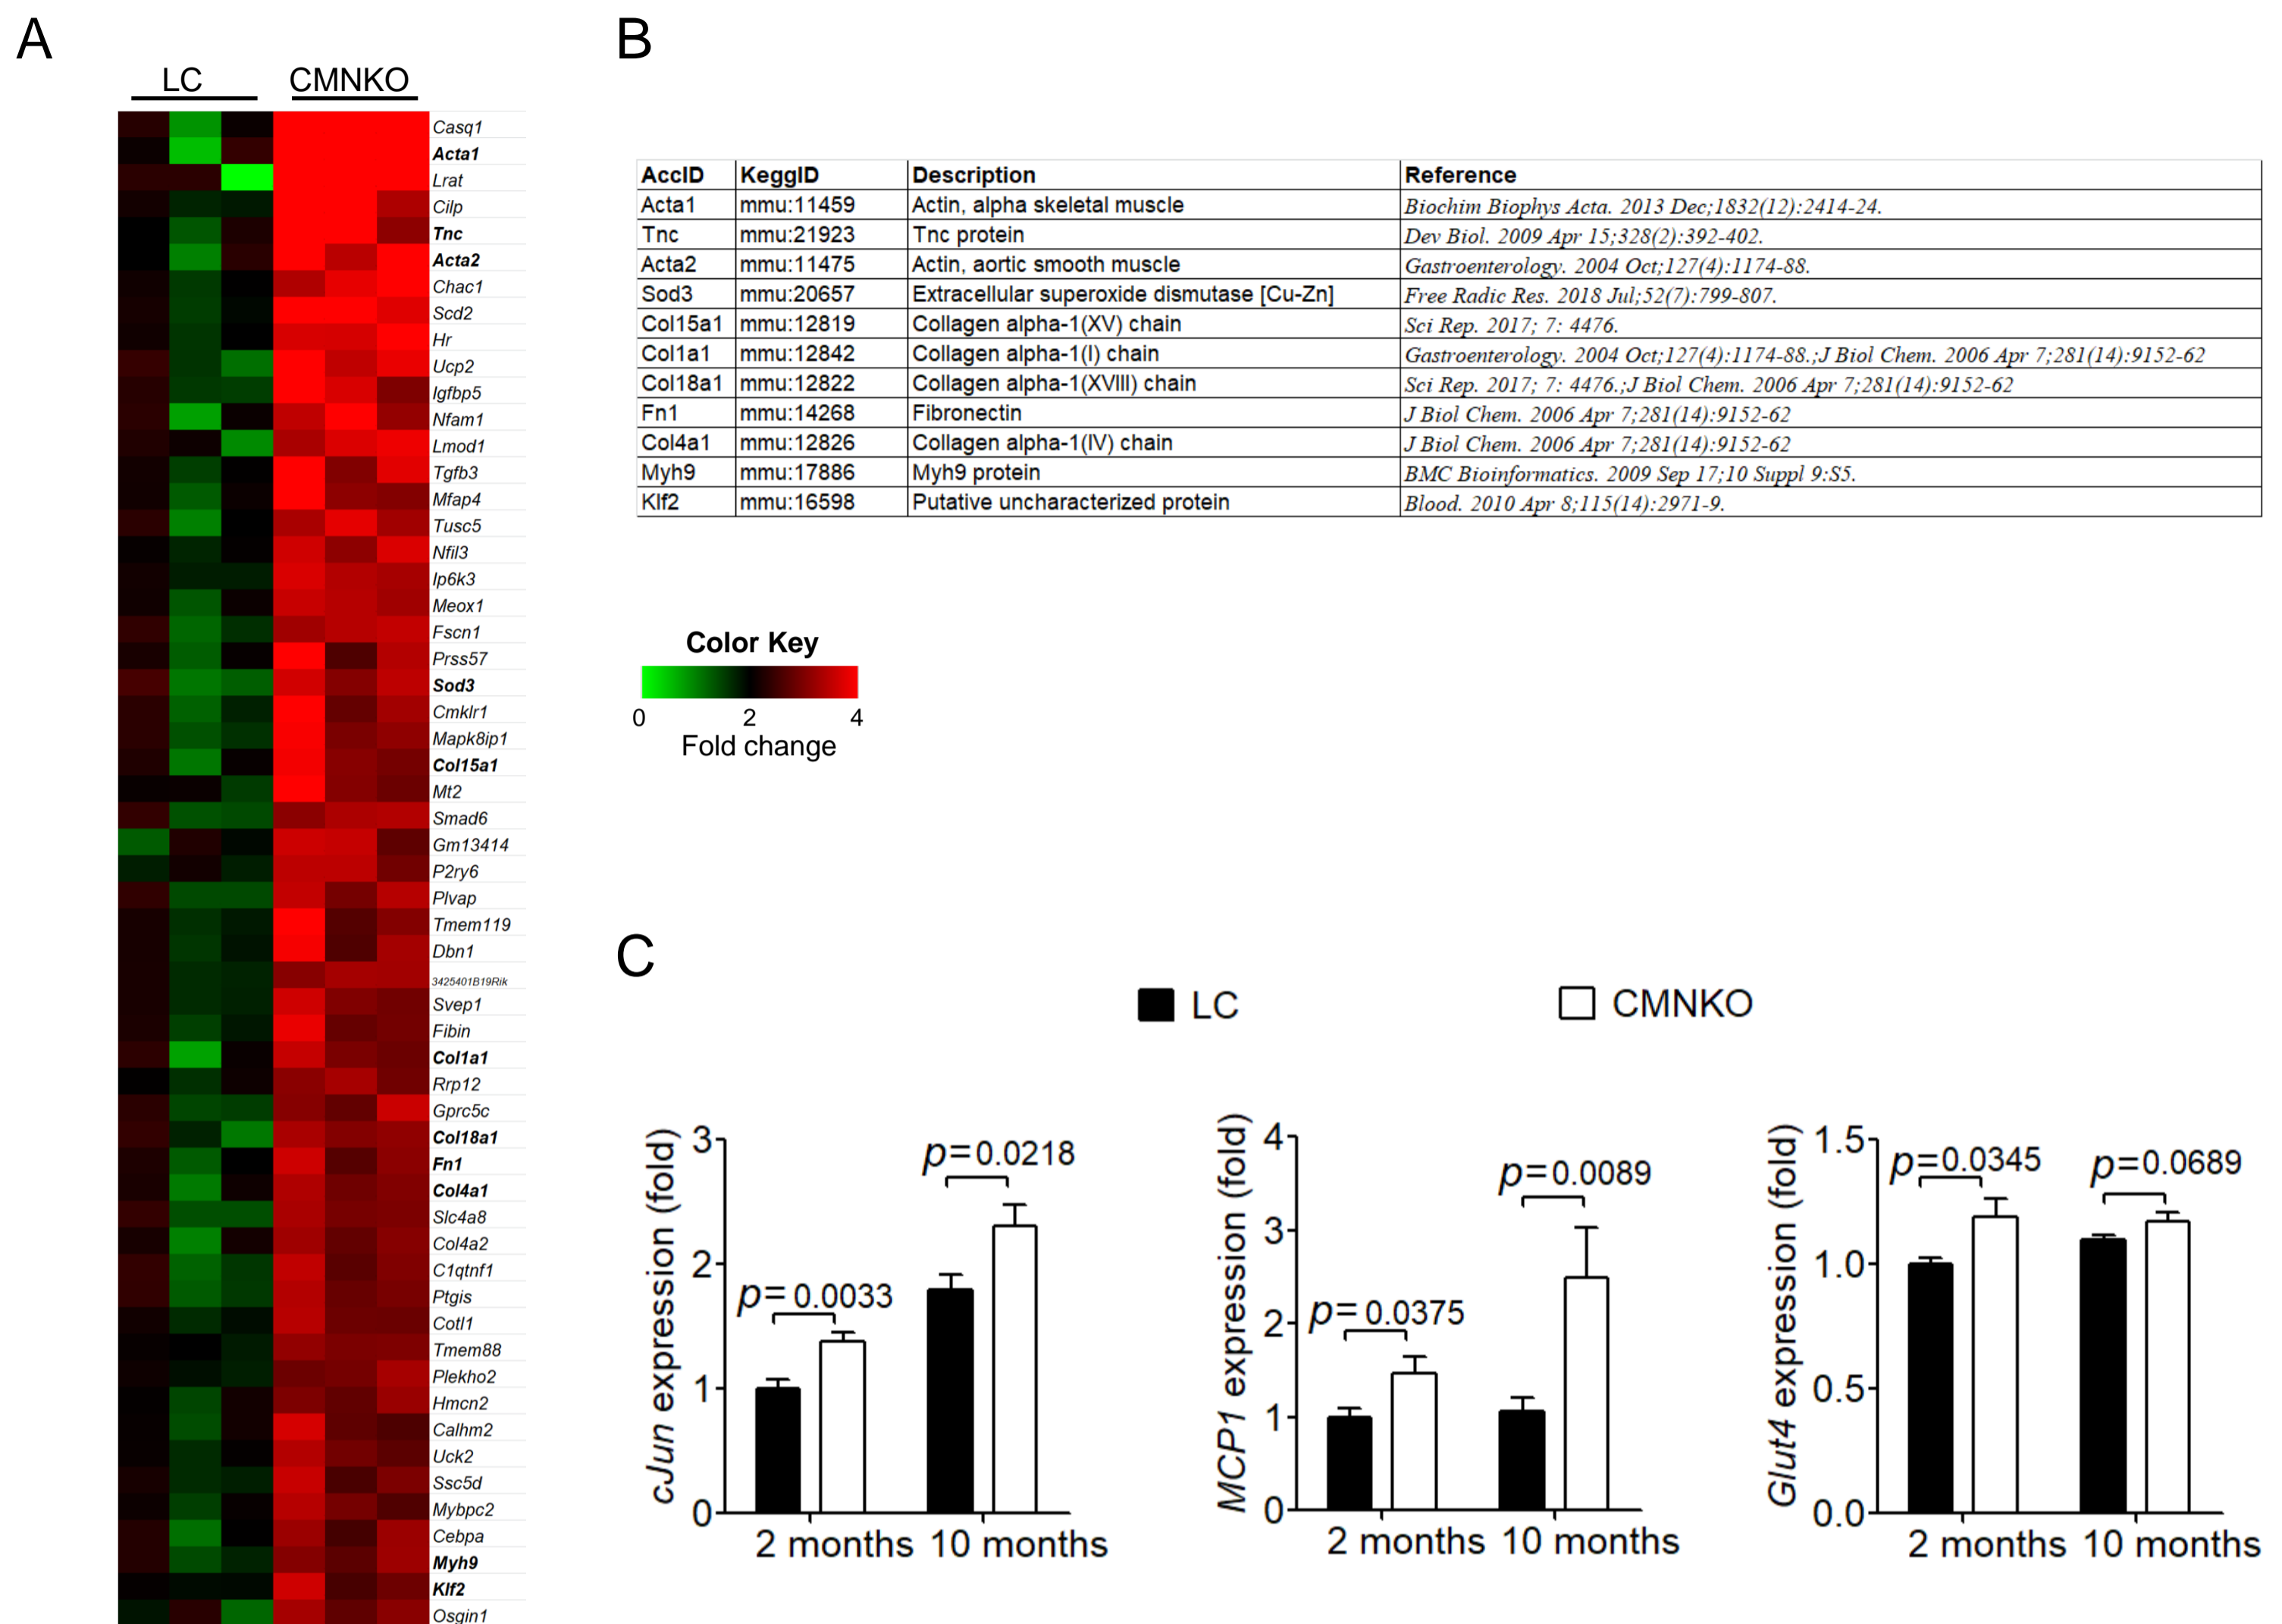

**Appendix Figure S2. RNA-sequencing analysis of ventricular samples from LC and CMNKO mice.** (A) Heat-map illustration of 57 genes upregulated by cardiomyocyte NCoR1 deficiency. Fold change > 2, FDR < 0.05, n = 3. (B) List of MEF2-regulated genes selected from (A). (C) qRT-PCR analysis of cJun, monocyte chemoattractant protein 1 (MCP1), and glucose transporter type 4 (Glut4) in left ventricles. n = 9:9:11:8. Student's t test was used for statistical analysis.

## Appendix Figure S3

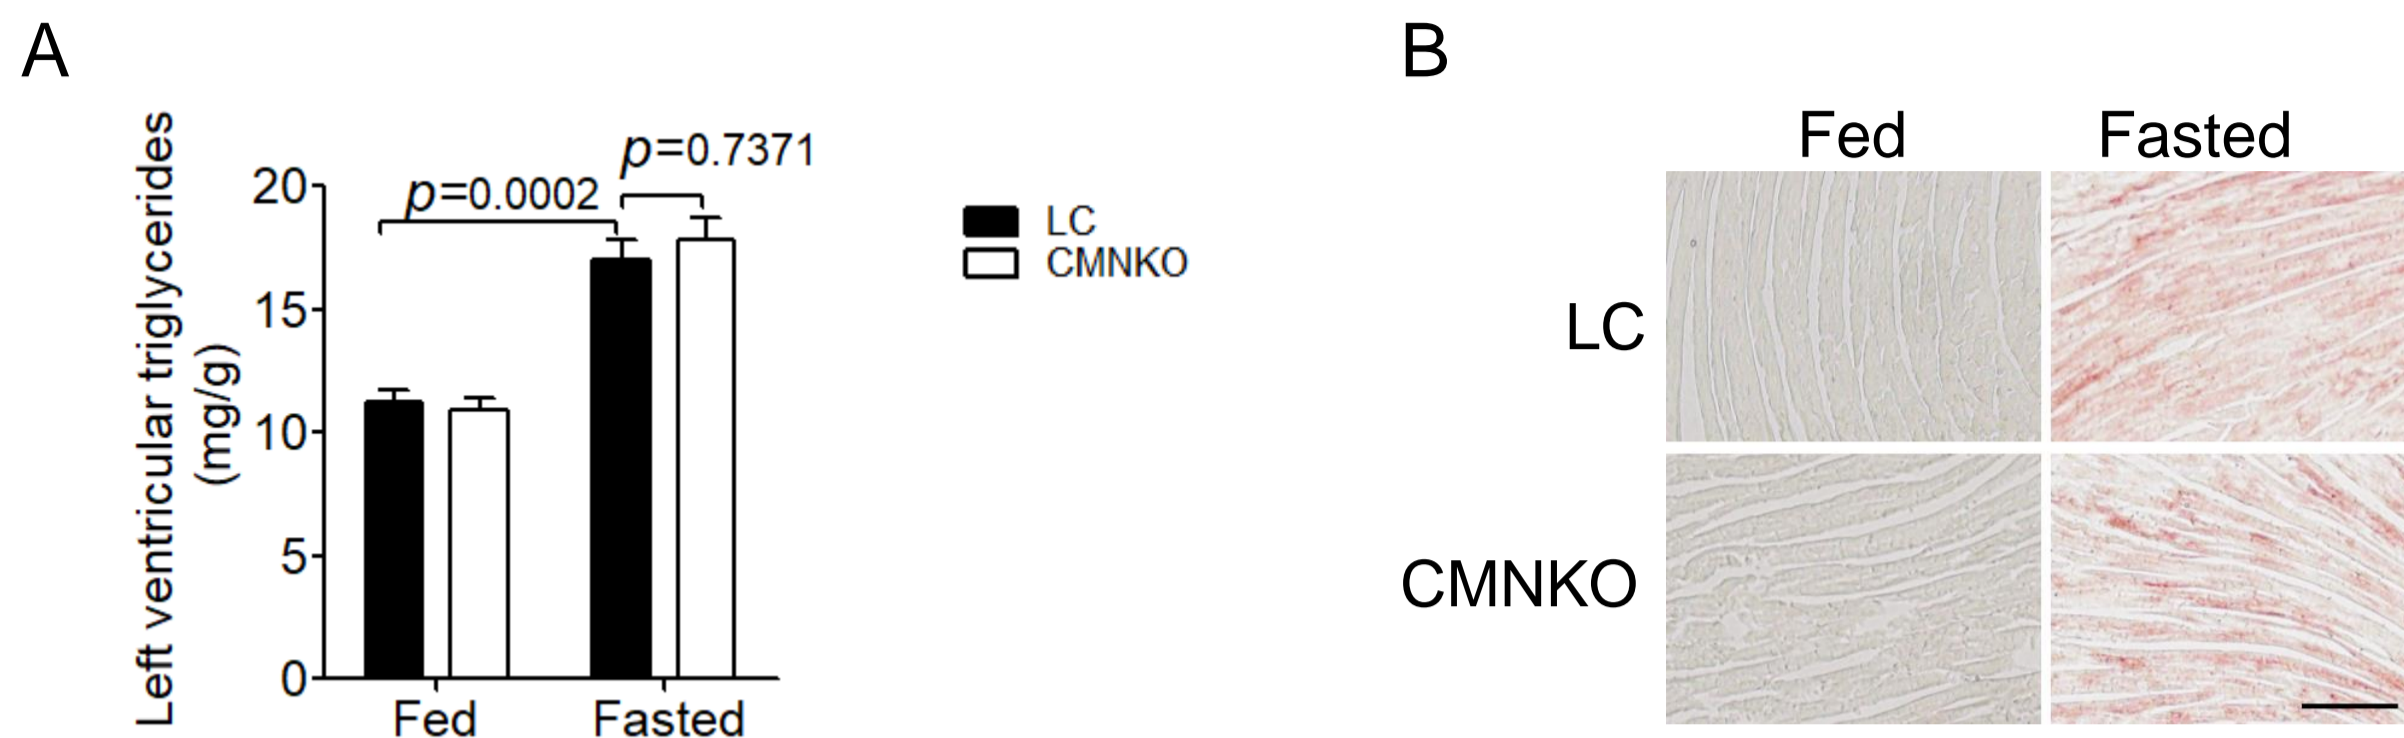

**Appendix Figure S3. NCoR1 does not affect the accumulation of triglycerides under fed or fasted condition.** (A) Myocardial triglyceride contents of 2-month-old LC or CMNKO mice that were either fed or fasted for 24h. n=6:4:5:8. (B) Oil red O staining of heart sections from LC or CMNKO mice that were either fed or fasted for 24h. n=6:4:5:8. Scale bar: 50 $\mu$ m. Two-way ANOVA followed by Bonferoni post-tests was used for statistical analysis.

**Appendix Table S1.** Cardiac function measured by echocardiography in 2-month and 10-month old mice.

|                              | 2 months     |              | 10 months   |                         |
|------------------------------|--------------|--------------|-------------|-------------------------|
|                              | LC (n=9)     | CMNKO (n=7)  | LC (n=14)   | CMNKO (n=10)            |
| <b>Heart Rate</b>            | 481.32±17.39 | 499.76±11.68 | 434.29±6.02 | 462.62±24.28            |
| <b>Diameter;s</b>            | 1.69±0.07    | 1.68±0.08    | 1.93±0.05   | 1.96±0.05               |
| <b>Diameter;d</b>            | 3.24±0.09    | 3.15±0.09    | 3.67±0.08   | 3.48±0.08               |
| <b>Volume;s</b>              | 8.61±0.90    | 8.35±0.95    | 11.90±0.84  | 12.25±0.79              |
| <b>Volume;d</b>              | 42.49±2.79   | 39.99±2.87   | 57.59±2.85  | 50.80±2.69              |
| <b>Stroke Volume</b>         | 33.88±1.98   | 31.63±2.04   | 45.69±2.35  | 38.55±2.29 <sup>a</sup> |
| <b>Ejection Fraction</b>     | 80.04±1.00   | 79.42±1.23   | 79.35±1.02  | 75.69±1.33 <sup>b</sup> |
| <b>Fractional Shortening</b> | 47.73±0.95   | 46.89±1.17   | 47.4±1.06   | 43.77±1.27 <sup>c</sup> |
| <b>Cardiac Output</b>        | 20.99±4.00   | 18.41±3.23   | 18.41±1.18  | 17.40±1.74              |
| <b>IVS;d</b>                 | 0.94±0.05    | 0.93±0.06    | 1.01±0.04   | 1.09±0.05               |
| <b>IVS;s</b>                 | 1.55±0.04    | 1.41±0.08    | 1.64±0.04   | 1.64±0.06               |
| <b>LVID;d</b>                | 3.19±0.06    | 3.21±0.11    | 3.65±0.1    | 3.48±0.11               |
| <b>LVID;s</b>                | 1.74±0.10    | 1.74±0.10    | 1.97±0.08   | 2.06±0.07               |
| <b>LVPW;d</b>                | 0.78±0.03    | 1.13±0.16    | 0.74±0.06   | 0.74±0.12               |
| <b>LVPW;s</b>                | 1.19±0.05    | 0.41±0.16    | 1.28±0.06   | 1.37±0.07               |

a indicates p=0.0469; b, p=0.037; c, p=0.0392 vs 10 month LC group. Student's t test was used for statistical analysis.



**Appendix Table S2.** Cardiac function measured by echocardiography in LC, CMNKO and  $\alpha$ MHC-Cre mice.

|                              | <b>LC (n=9)</b> | <b>CMNKO (n=11)</b>     | <b><math>\alpha</math>MHC-Cre (n=7)</b> |
|------------------------------|-----------------|-------------------------|-----------------------------------------|
| <b>Heart Rate</b>            | 521.20±5.45     | 506.89±11.12            | 540.25±4.78                             |
| <b>Diameter;s</b>            | 2.08±0.09       | 1.96±0.05               | 2.09±0.04                               |
| <b>Diameter;d</b>            | 4.02±0.11       | 3.43±0.07 <sup>a</sup>  | 4.12±0.07 <sup>i</sup>                  |
| <b>Volume;s</b>              | 14.58±1.52      | 12.25±0.77              | 14.36±0.74                              |
| <b>Volume;d</b>              | 71.75±4.56      | 48.90±2.50 <sup>b</sup> | 75.29±3.14 <sup>j</sup>                 |
| <b>Stroke Volume</b>         | 57.17±3.55      | 36.65±1.79 <sup>c</sup> | 60.92±2.49                              |
| <b>Ejection Fraction</b>     | 79.90±1.40      | 75.06±0.51 <sup>d</sup> | 80.95±0.43 <sup>k</sup>                 |
| <b>Fractional Shortening</b> | 48.28±1.40      | 42.92±0.44 <sup>e</sup> | 49.19±0.44 <sup>l</sup>                 |
| <b>Cardiac Output</b>        | 29.82±1.93      | 18.64±1.08 <sup>f</sup> | 32.91±1.35 <sup>m</sup>                 |
| <b>IVS;d</b>                 | 0.86±0.07       | 1.12±0.05 <sup>g</sup>  | 1.04±0.14                               |
| <b>IVS;s</b>                 | 1.34±0.06       | 1.34±0.07               | 1.43±0.05                               |
| <b>LVID;d</b>                | 3.73±0.12       | 3.25±0.10 <sup>h</sup>  | 3.65±0.1 <sup>n</sup>                   |
| <b>LVID;s</b>                | 2.15±0.09       | 1.98±0.06               | 2.17±0.05                               |
| <b>LVPW;d</b>                | 1.21±0.07       | 1.35±0.09               | 1.40±0.12                               |
| <b>LVPW;s</b>                | 1.32±0.09       | 1.54±0.09               | 1.38±0.13                               |

a indicates  $p=0.0002$ ; b,  $p=0.0002$ ; c,  $p<0.0001$ ; d,  $p=0.0025$ ; e,  $p=0.0009$ ; f,  $p<0.0001$ ; g,  $p=0.0065$ ; h,  $p=0.0066$  vs LC group. i indicated  $p=0.5125$ ; j,  $p=0.5582$ ; k,  $p=0.5305$ ; m,  $p=0.2367$ ; n,  $p=0.6402$  vs LC. Student's t test was used for statistical analysis.

**Appendix Table S3.** Cardiac function measured by echocardiography in LC and CMNKO mice with or without AAC.

|                              | Sham         |              | AAC                     |                         |
|------------------------------|--------------|--------------|-------------------------|-------------------------|
|                              | LC (n=9)     | CMNKO (n=7)  | LC (n=14)               | CMNKO (n=12)            |
| <b>Heart Rate</b>            | 469.80±16.98 | 503.87±11.36 | 457.67±7.79             | 473.82±15.13            |
| <b>Diameter;s</b>            | 1.55±0.07    | 1.72±0.15    | 2.36±0.11 <sup>a</sup>  | 3.34±0.20 <sup>b</sup>  |
| <b>Diameter;d</b>            | 3.07±0.07    | 3.18±0.17    | 3.65±0.10 <sup>c</sup>  | 4.12±0.16 <sup>d</sup>  |
| <b>Volume;s</b>              | 6.86±0.81    | 9.39±2.44    | 20.45±2.64 <sup>e</sup> | 48.26±5.87 <sup>f</sup> |
| <b>Volume;d</b>              | 37.31±2.13   | 41.41±5.95   | 57.20±3.79 <sup>g</sup> | 77.08±6.39 <sup>h</sup> |
| <b>Stroke Volume</b>         | 30.45±1.50   | 32.02±3.35   | 36.75±1.65              | 28.83±2.03 <sup>i</sup> |
| <b>Ejection Fraction</b>     | 81.96±1.39   | 78.84±1.96   | 65.52±2.10 <sup>j</sup> | 40.36±4.11 <sup>k</sup> |
| <b>Fractional Shortening</b> | 49.73±1.55   | 46.43±1.72   | 35.58±1.51 <sup>l</sup> | 19.93±2.45 <sup>m</sup> |
| <b>Cardiac Output</b>        | 14.42±1.06   | 16.19±1.98   | 16.21±0.74              | 13.062±0.98             |
| <b>IVS;d</b>                 | 0.97±0.06    | 1.01±0.06    | 1.19±0.04               | 1.26±0.06               |
| <b>IVS;s</b>                 | 1.58±0.03    | 1.53±0.07    | 1.73±0.05               | 1.57±0.07               |
| <b>LVID;d</b>                | 3.08±0.07    | 3.26±0.16    | 3.69±0.10               | 4.23±0.17               |
| <b>LVID;s</b>                | 1.58±0.04    | 1.78±0.16    | 2.40±0.11 <sup>n</sup>  | 3.41±0.21 <sup>o</sup>  |
| <b>LVPW;d</b>                | 0.75±0.03    | 1.00±0.20    | 1.06±0.06               | 1.09±0.07               |
| <b>LVPW;s</b>                | 1.25±0.07    | 1.57±0.16    | 1.56±0.06               | 1.34±0.10               |

2-3 month old mice were subjected to Sham operation or AAC. Heart function was measured 2 weeks after surgery. a indicates p=0.0007; b, p<0.0001; c, p=0.0041; d, p=0.012; e, p=0.0331; f, p<0.0001; g, p=0.0125; h, p=0.0065; I, p=0.0098; j, p=0.0005; k, p<0.0001; l, p<0.0001; m, p<0.0001; n, p=0.001; o, p<0.0001. a, c, e, g, j, l and n vs Sham LC Group. b, d, f, h, I, k, m and o vs AAC LC group. Two-way ANOVA followed by Bonferoni post-tests was used for statistical analysis.

**Appendix Table S4.** Cardiac function measured by echocardiography in mice infected with AAV9 GFP or AAV9 NCoR1-RIDs.

|                              | NO surgery     |                       | AAC 2 weeks    |                         | AAC 4 weeks    |                         |
|------------------------------|----------------|-----------------------|----------------|-------------------------|----------------|-------------------------|
|                              | AAV9 GFP (n=6) | AAV9 NCoR1-RIDs (n=6) | AAV9 GFP (n=6) | AAV9 NCoR1-RIDs (n=6)   | AAV9 GFP (n=6) | AAV9 NCoR1-RIDs (n=6)   |
| <b>Heart Rate</b>            | 464.89±6.45    | 464.60±6.88           | 473.55±7.62    | 475.14±8.13             | 478.21±7.11    | 476.09±6.34             |
| <b>Diameter;s</b>            | 2.07±0.33      | 2.16±0.09             | 2.67±0.15      | 2.71±0.18               | 3.04±0.09      | 2.37±0.16 <sup>a</sup>  |
| <b>Diameter;d</b>            | 3.34±0.19      | 3.38±0.16             | 3.72±0.17      | 4.10±0.16               | 3.75±0.08      | 3.19±0.16               |
| <b>Volume;s</b>              | 14.44±2.23     | 15.79±1.65            | 27.08±3.82     | 28.42±5.31              | 36.53±2.54     | 20.24±3.23              |
| <b>Volume;d</b>              | 46.67±6.00     | 47.55±5.35            | 60.00±6.84     | 74.96±7.49              | 60.36±3.15     | 41.39±4.82              |
| <b>Stroke Volume</b>         | 32.23±3.98     | 31.77±3.83            | 32.93±3.63     | 46.54±2.73              | 23.83±1.50     | 21.15±1.75              |
| <b>Ejection Fraction</b>     | 69.39±1.42     | 66.50±1.14            | 55.37±2.72     | 63.23±2.81 <sup>b</sup> | 39.62±1.91     | 52.31±2.38 <sup>c</sup> |
| <b>Fractional Shortening</b> | 38.03±1.08     | 35.83±0.95            | 28.32±1.73     | 34.04±1.90 <sup>d</sup> | 18.89±1.03     | 26.01±1.38 <sup>e</sup> |
| <b>Cardiac Output</b>        | 14.97±1.81     | 14.78±1.85            | 15.66±1.90     | 22.15±1.47              | 11.37±0.66     | 10.03±0.74              |
| <b>IVS;d</b>                 | 1.06±0.12      | 0.97±0.11             | 1.16±0.07      | 1.18±0.07               | 1.04±0.08      | 1.20±0.10               |
| <b>IVS;s</b>                 | 1.34±0.06      | 1.36±0.08             | 1.44±0.15      | 1.30±0.07               | 0.90±0.04      | 0.99±0.06               |
| <b>LVID;d</b>                | 3.20±0.20      | 3.46±0.15             | 3.70±0.21      | 3.77±0.12               | 3.81±0.08      | 3.22±0.13               |
| <b>LVID;s</b>                | 2.15±0.19      | 2.46±0.11             | 2.71±0.19      | 2.67±0.16               | 3.13±0.10      | 2.36±0.13 <sup>f</sup>  |
| <b>LVPW;d</b>                | 0.92±0.12      | 1.00±0.13             | 1.47±0.07      | 1.04±0.07               | 1.06±0.08      | 1.10±0.09               |
| <b>LVPW;s</b>                | 1.24±0.07      | 1.19±0.13             | 1.74±0.07      | 1.36±0.08               | 1.21±0.07      | 1.28±0.08               |

2 month old mice were subjected to Sham operation or AAC. Heart function was measured before, 2 weeks and 4 weeks after surgery. a indicates p=0.0049; b, p=0.0453; c, p=0.0007; d, p=0.0206; e, p=0.0032; f, p=0.0036. b and d vs AAV9 GFP AAC 2 weeks. a, c, e and f vs AAV9 GFP AAC 4 weeks. Two-way ANOVA followed by Bonferoni post-tests was used for statistical analysis.



**Appendix Table S5.** List of primer sequences for qRT-PCR

| <b>Name</b> | <b>Sequence</b>           | <b>Species</b> |
|-------------|---------------------------|----------------|
| GAPDH F     | ATGTTCCAGTATGACTCCACTCACG | mouse          |
| GAPDH R     | GAAGACACCAGTAGACTCCACGACA | mouse          |
| 18s F       | TTGATTAAGTCCCTGCCCTTTGT   | mouse          |
| 18s R       | CGATCCGAGGGCCTCACTA       | mouse          |
| Acta1 F     | CCCAAAGCTAACCGGGAGAAG     | mouse          |
| Acta1 R     | CCAGAATCCAACACGATGCC      | mouse          |
| Nppa F      | GCTTCCAGGCCATATTGGAG      | mouse          |
| Nppa R      | GGGGGCATGACCTCATCTT       | mouse          |
| Nppb F      | ATGGATCTCCTGAAGGTGCTG     | mouse          |
| Nppb R      | GTGCTGCCTTGAGACCGAA       | mouse          |
| Col1a1 F    | GCTCCTCTTAGGGGCCACT       | mouse          |
| Col1a1 R    | CCACGTCTCACCATTGGGG       | mouse          |
| Col1a2 F    | GTAACCTTCGTGCCTAGCAACA    | mouse          |
| Col1a2 R    | CCTTTGTCAGAATACTGAGCAGC   | mouse          |
| Fn1 F       | ATGTGGACCCCTCCTGATAGT     | mouse          |
| Fn1 R       | GCCCAGTGATTTTCAGCAAAGG    | mouse          |
| CTGF F      | GGGCCTCTTCTGCGATTTT       | mouse          |
| CTGF R      | ATCCAGGCAAGTGCATTGGTA     | mouse          |
| Tgfb3 F     | CAGGCCAGGGTAGTCAGAG       | mouse          |
| Tgfb3 R     | ATTTCCAGCCTAGATCCTGCC     | mouse          |
| NCoR1 F     | CTGGTCTTTCAGCCACCATT      | mouse          |
| NCoR1 R     | CCTTCATTGGATCCTCCATC      | mouse          |
| cJun-F      | GCATTTGGAGAGTCCCTTCTC     | mouse          |
| cJun-R      | TTAAGGCGCAGAAGAGATTTG     | mouse          |
| MCP-1 F     | TTAAAAACCTGGATCGGAACCAA   | mouse          |
| MCP-1 R     | GCATTAGCTTCAGATTTACGGGT   | mouse          |
| Glut4 F     | GTGACTGGAACACTGGTCCTA     | mouse          |
| Glut4 R     | CCAGCCACGTTGCATTGTAG      | mouse          |
| ACTA1 F     | AGCAGCAGAACTAGACACCA      | Rat            |
| ACTA1 R     | CCACGATGGATGGGAACACA      | Rat            |
| Nppa F      | CTTCTTCCTCTTCCTGGCCT      | Rat            |
| Nppb R      | TTCATCGGTCTGCTCGCTCA      | Rat            |
| GAPDH F     | GCGAGATCCCGCTAACATCA      | Rat            |
| GAPDH R     | CTCGTGGTTCACACCCATCA      | Rat            |
| MEF2a F     | AGAGGAACCGACAGGTGACT      | Rat            |
| MEF2a R     | AGTGCTGGCGTACTGAAACA      | Rat            |
| MEF2c F     | ACAAGCCAAATCTCCTCCCC      | Rat            |
| MEF2c R     | ACATCCTCAGACACTGATGGC     | Rat            |
| MEF2d F     | GCATCATTTGAACAATGCCCA     | Rat            |
| MEF2d R     | GGCCCTGGCTGAGTAACTT       | Rat            |
| 18s F       | CTTAGAGGGACAAGTGGCG       | Human          |
| 18s R       | ACGCTGAGCCAGTCAGTGTA      | Human          |
| Nppa F      | GCAGGATGGACAGGATTGGAG     | Human          |
| Nppa R      | GTCCTCCCTGGCTGTTATCT      | Human          |
| Myh7 F      | GTCTTTCCCTGCTGCTCTCAG     | Human          |
| Myh7 R      | GGGCTACTCAAGTGTGTCTAC     | Human          |
| Nppb F      | CTTTCCTGGGAGGTGTTCC       | Human          |
| Nppb R      | GTTGCGCTGCTCCTGTAAC       | Human          |
