# Supplementary material for: Nuclear receptor corepressor 1 represses cardiac hypertrophy
Source: PubMed Central journal article supplement (PMC6835202; doi:10.15252/emmm.201809127), 2019-09-18
Supplement: EMMM-11-e9127-s002.pdf [file EMMM-11-e9127-s002.pdf]

## Expanded View Figures

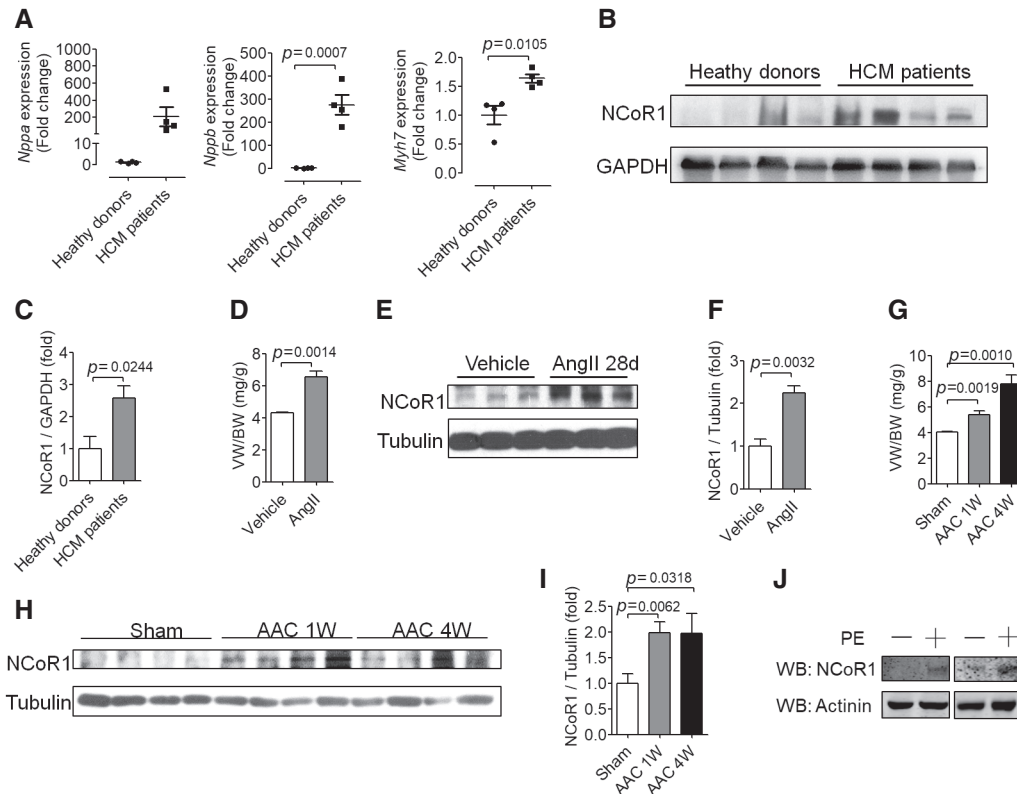

**Figure EV1. The expression of nuclear receptor corepressor 1 (NCoR1) is elevated in hypertrophied hearts or cardiomyocytes.**

- A Quantitative reverse transcriptase polymerase chain reaction (qRT-PCR) analysis of hypertrophy-related genes in heart samples from healthy donors or hypertrophic cardiomyopathy (HCM) patients.  $n = 4:4$ . *Nppa*, natriuretic peptide type A; *Nppb*, natriuretic peptide type B; *Myh7*, myosin, heavy polypeptide 7, cardiac muscle, beta.
- B Western blotting analysis of NCoR1 in heart samples from healthy donors or HCM patients.
- C Quantification of (B).  $n = 4:4$ .
- D Ventricular weight-to-body weight ratio (VW/BW) of C57BL/6 mice infused with vehicle (0.9% NaCl) or angiotensin II (AngII) for 4 weeks.  $n = 3:3$ .
- E Western blotting analysis of NCoR1 in ventricular samples from mice shown in (D).
- F Quantification of (E).  $n = 3:3$ .
- G VW/BW of C57BL/6 mice subjected to sham operation or abdominal aortic constriction (AAC) for 1 or 4 weeks.  $n = 4:4:4$ .
- H Western blotting analysis of NCoR1 in ventricular samples from mice shown in (G).
- I Quantification of (H).  $n = 4:4:4$ .
- J Western blotting analysis of NCoR1 in neonatal rat ventricular myocytes treated without or with phenylephrine (PE) for 24 h.

Data information: Data are presented as mean  $\pm$  SEM. Student's *t*-test was used for statistical analysis.

Source data are available online for this figure.

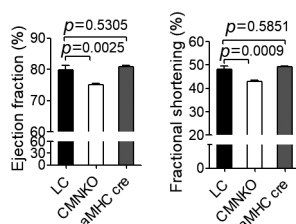

**Figure EV2.  $\alpha$ MHC-Cre did not affect cardiac function in 10-month-old mice.**

Ejection fraction and fractional shortening measured by echocardiography. LC, littermate control mice; CMNKO, cardiomyocyte-specific NCoR1 knockout mice.  $n = 9:11:7$ . Data are presented as mean  $\pm$  SEM. Student's *t*-test was used for statistical analysis.

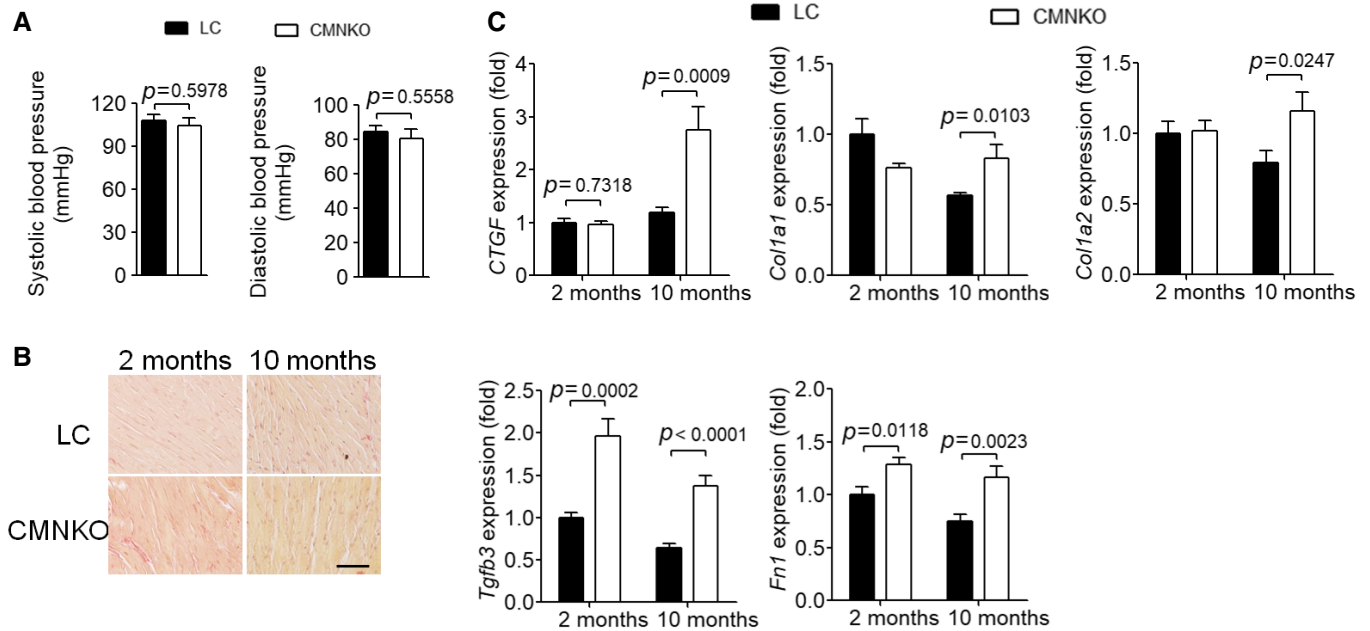

**Figure EV3. NCoR1 deficiency in cardiomyocytes does not affect blood pressure or cardiac fibrosis.**

A Systolic blood pressure and diastolic blood pressure were monitored using non-invasive tail-cuff system in 2-month-old mice.  $n = 6:6$ .

B Picosirius red staining of cross sections of left ventricles of LC or CMNKO mice. Scale bar: 50  $\mu\text{m}$ .

C qRT-PCR analysis of fibrosis-related genes in left ventricles of LC or CMNKO mice.  $n = 9:9:11:8$ . CTGF indicates connective tissue growth factor precursor; Fn1, fibronectin 1; TGF $\beta$ 3, transforming growth factor  $\beta$  3; Col1a1, collagen, type I, alpha 1; Col1a2, collagen, type I, alpha 2.

Data information: Data are presented as mean  $\pm$  SEM. Student's  $t$ -test was used for statistical analysis.

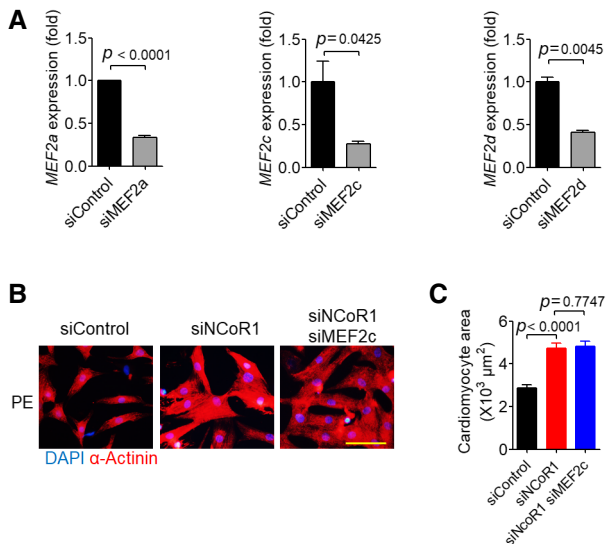

**Figure EV4. MEF2c does not mediate the effects of NCoR1 on PE-induced cardiomyocyte hypertrophy.**

A Knockdown efficiency of MEF2a, MEF2c, and MEF2d in NRVMs. siControl indicates control siRNA; siMEF2a indicates MEF2a siRNA; siMEF2c, MEF2c siRNA; siMEF2d, MEF2d siRNA.  $n = 3$ .

B Representative immunofluorescence staining of  $\alpha$ -Actinin in NRVMs transfected with siRNA for 48 h and then treated with PE for another 48 h. Scale bar: 50  $\mu\text{m}$ .

C Quantification of the surface area of  $\alpha$ -Actinin-positive NRVMs with or without knockdown of NCoR1 and/or MEF2c. A total of 30 NRVMs were randomly chosen from three replicate coverslips for each group and used for statistical analysis.

Data information: Data represent three independent experiments. Data are presented as mean  $\pm$  SEM. Student's  $t$ -test was used for statistical analysis.

**Figure EV5. NCoR1 affects subcellular translocation of HDACs but does not directly interact with them in NRVMs.**

- A Representative immunofluorescence staining of HDAC4-GFP in NRVMs. Cells were infected by HDAC4-GFP adenovirus and then control lentivirus (Control) or NCoR1-flag lentivirus (NCoR1-OV), and subsequently treated with vehicle (H<sub>2</sub>O) or PE. Scale bar: 20  $\mu$ m.
- B Quantification of cytosolic accumulation of HDAC4-GFP.  $n = 5$ .
- C Representative immunofluorescence staining of HDAC5-GFP in NRVMs. Cells were infected by HDAC5-GFP adenovirus and then control lentivirus (Control) or NCoR1-flag lentivirus (NCoR1-OV), and subsequently treated with vehicle or PE. Scale bar: 20  $\mu$ m.
- D Quantification of cytosolic accumulation of HDAC5-GFP.  $n = 5$ .
- E Co-IP analysis detecting interactions between NCoR1 and HDAC4, HDAC5 or HDAC9 in NRVMs. Cells were infected with NCoR1-flag lentivirus and then HDAC4 adenovirus, HDAC5-GFP adenovirus, or HDAC9 adenovirus.
- F Co-IP analysis showing interactions between NCoR1, MEF2a, and HDAC4 in ventricular samples.
- G Co-IP analysis detecting interactions between NCoR1, MEF2a, and HDAC5 in NRVMs. Cells were infected with NCoR1-flag lentivirus and then MEF2a-HA lentivirus and HDAC5-GFP adenovirus.

Data information: Data represent three independent experiments. Data are presented as mean  $\pm$  SEM. Two-way ANOVA followed by Bonferroni post-tests was used for statistical analysis.

Source data are available online for this figure.

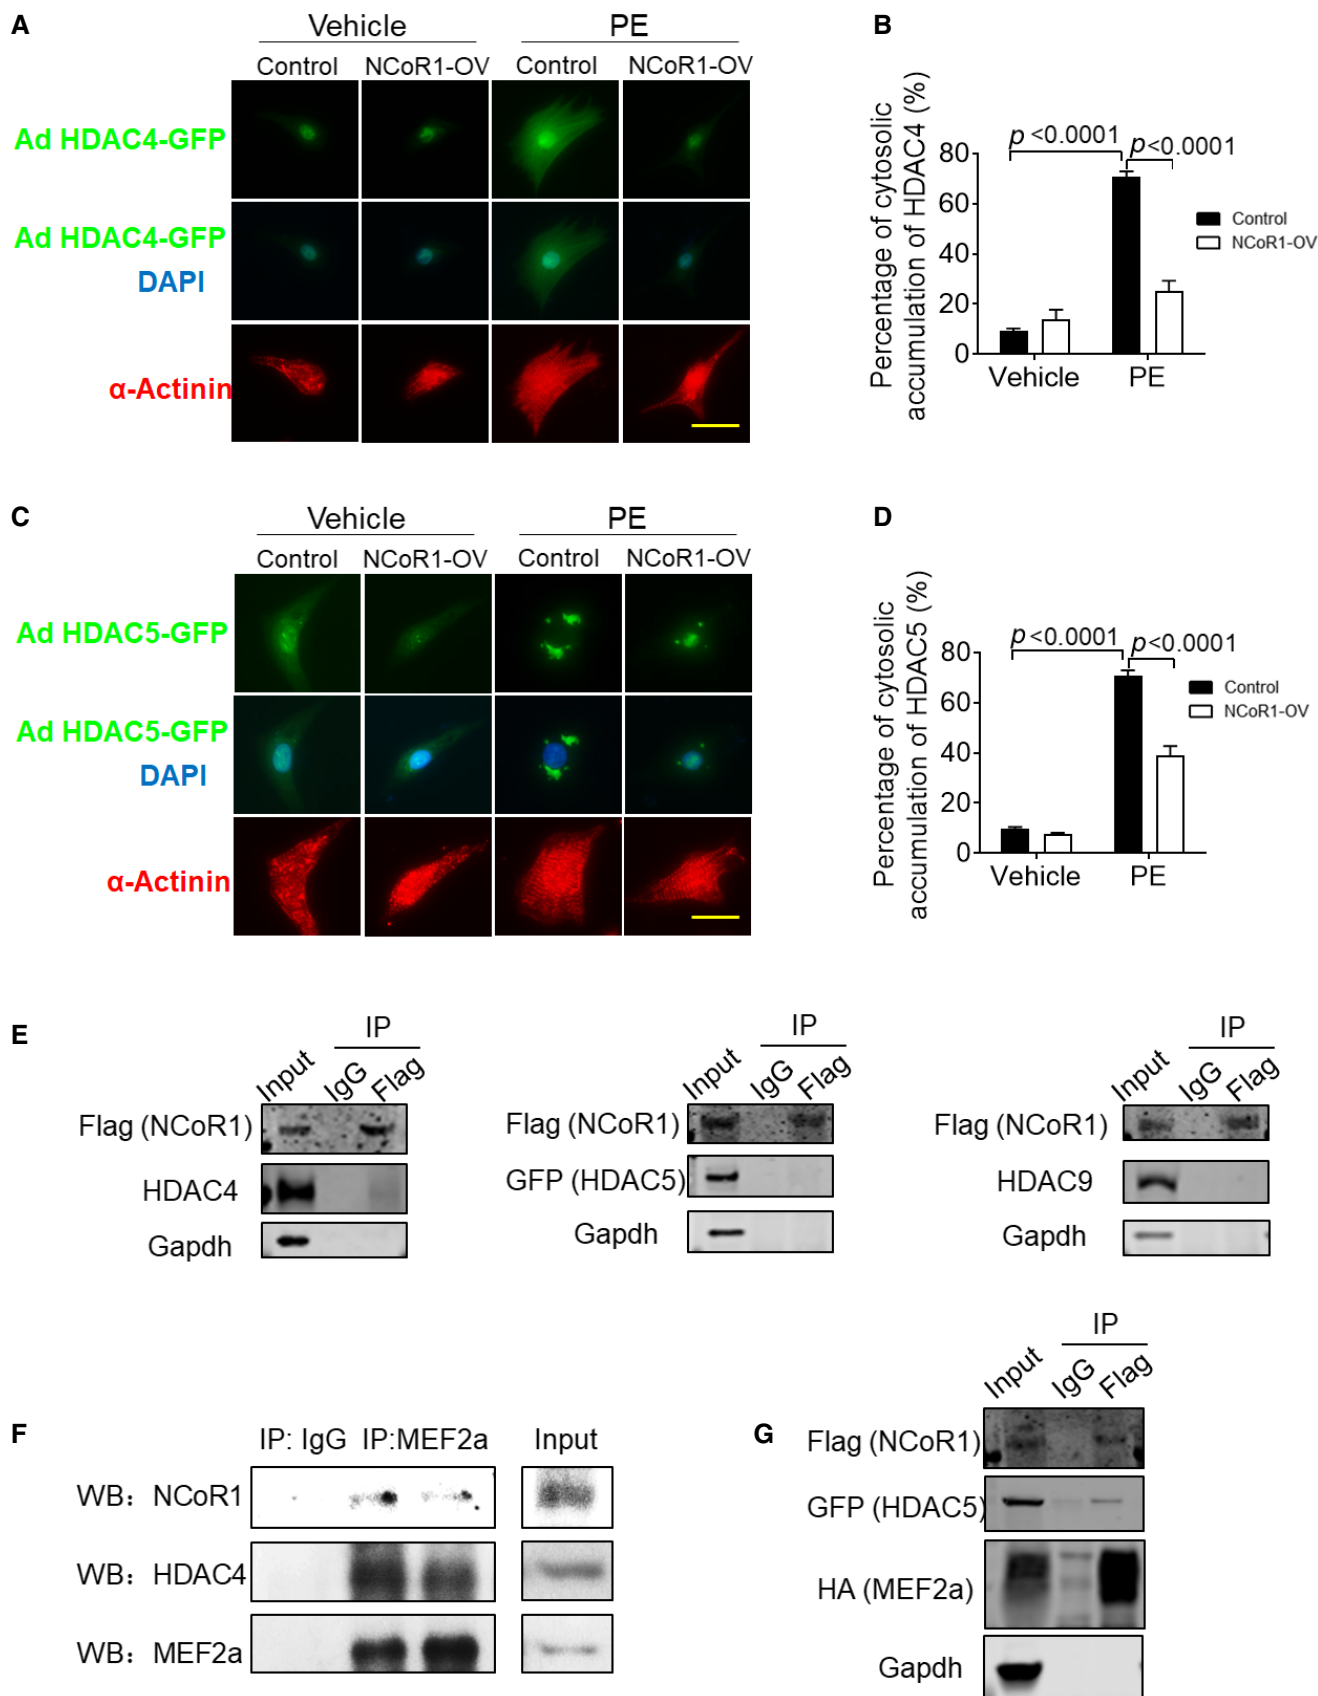

Figure EV5.
