# Supplementary material for: Nuclear receptor corepressor 1 represses cardiac hypertrophy
Source: PubMed Central journal article supplement (PMC6835202; doi:10.15252/emmm.201809127), 2019-09-18

Figure 5B

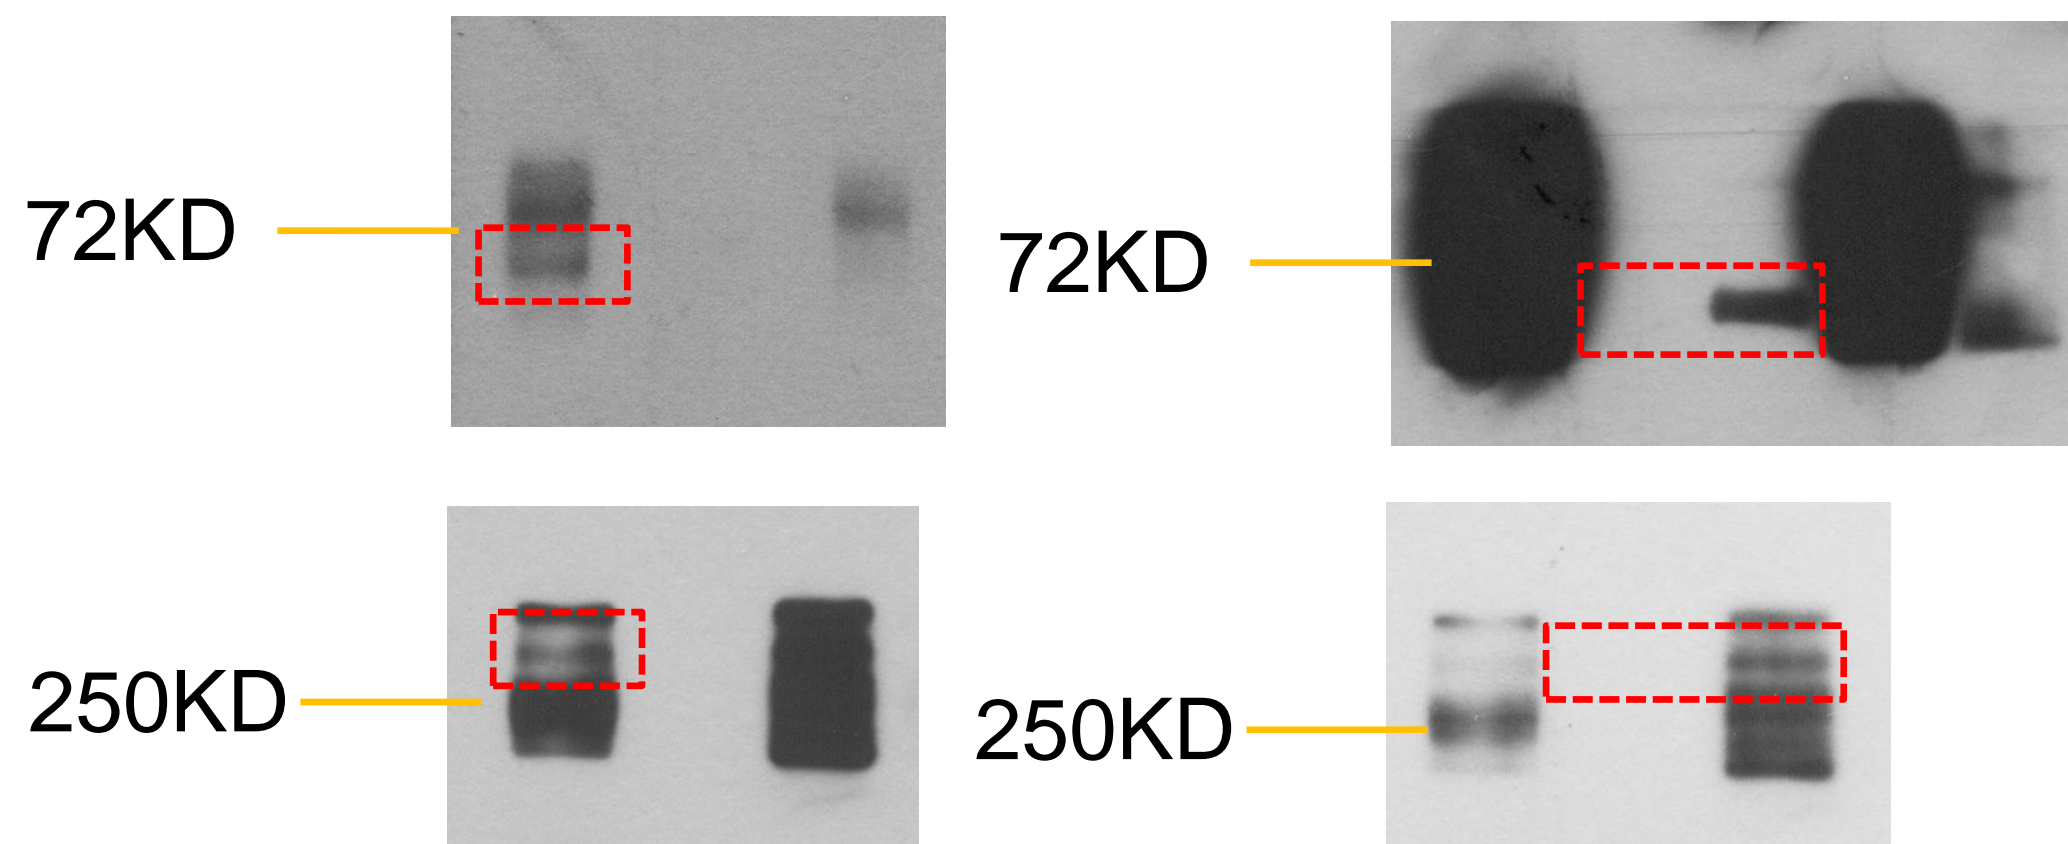

Figure 5C

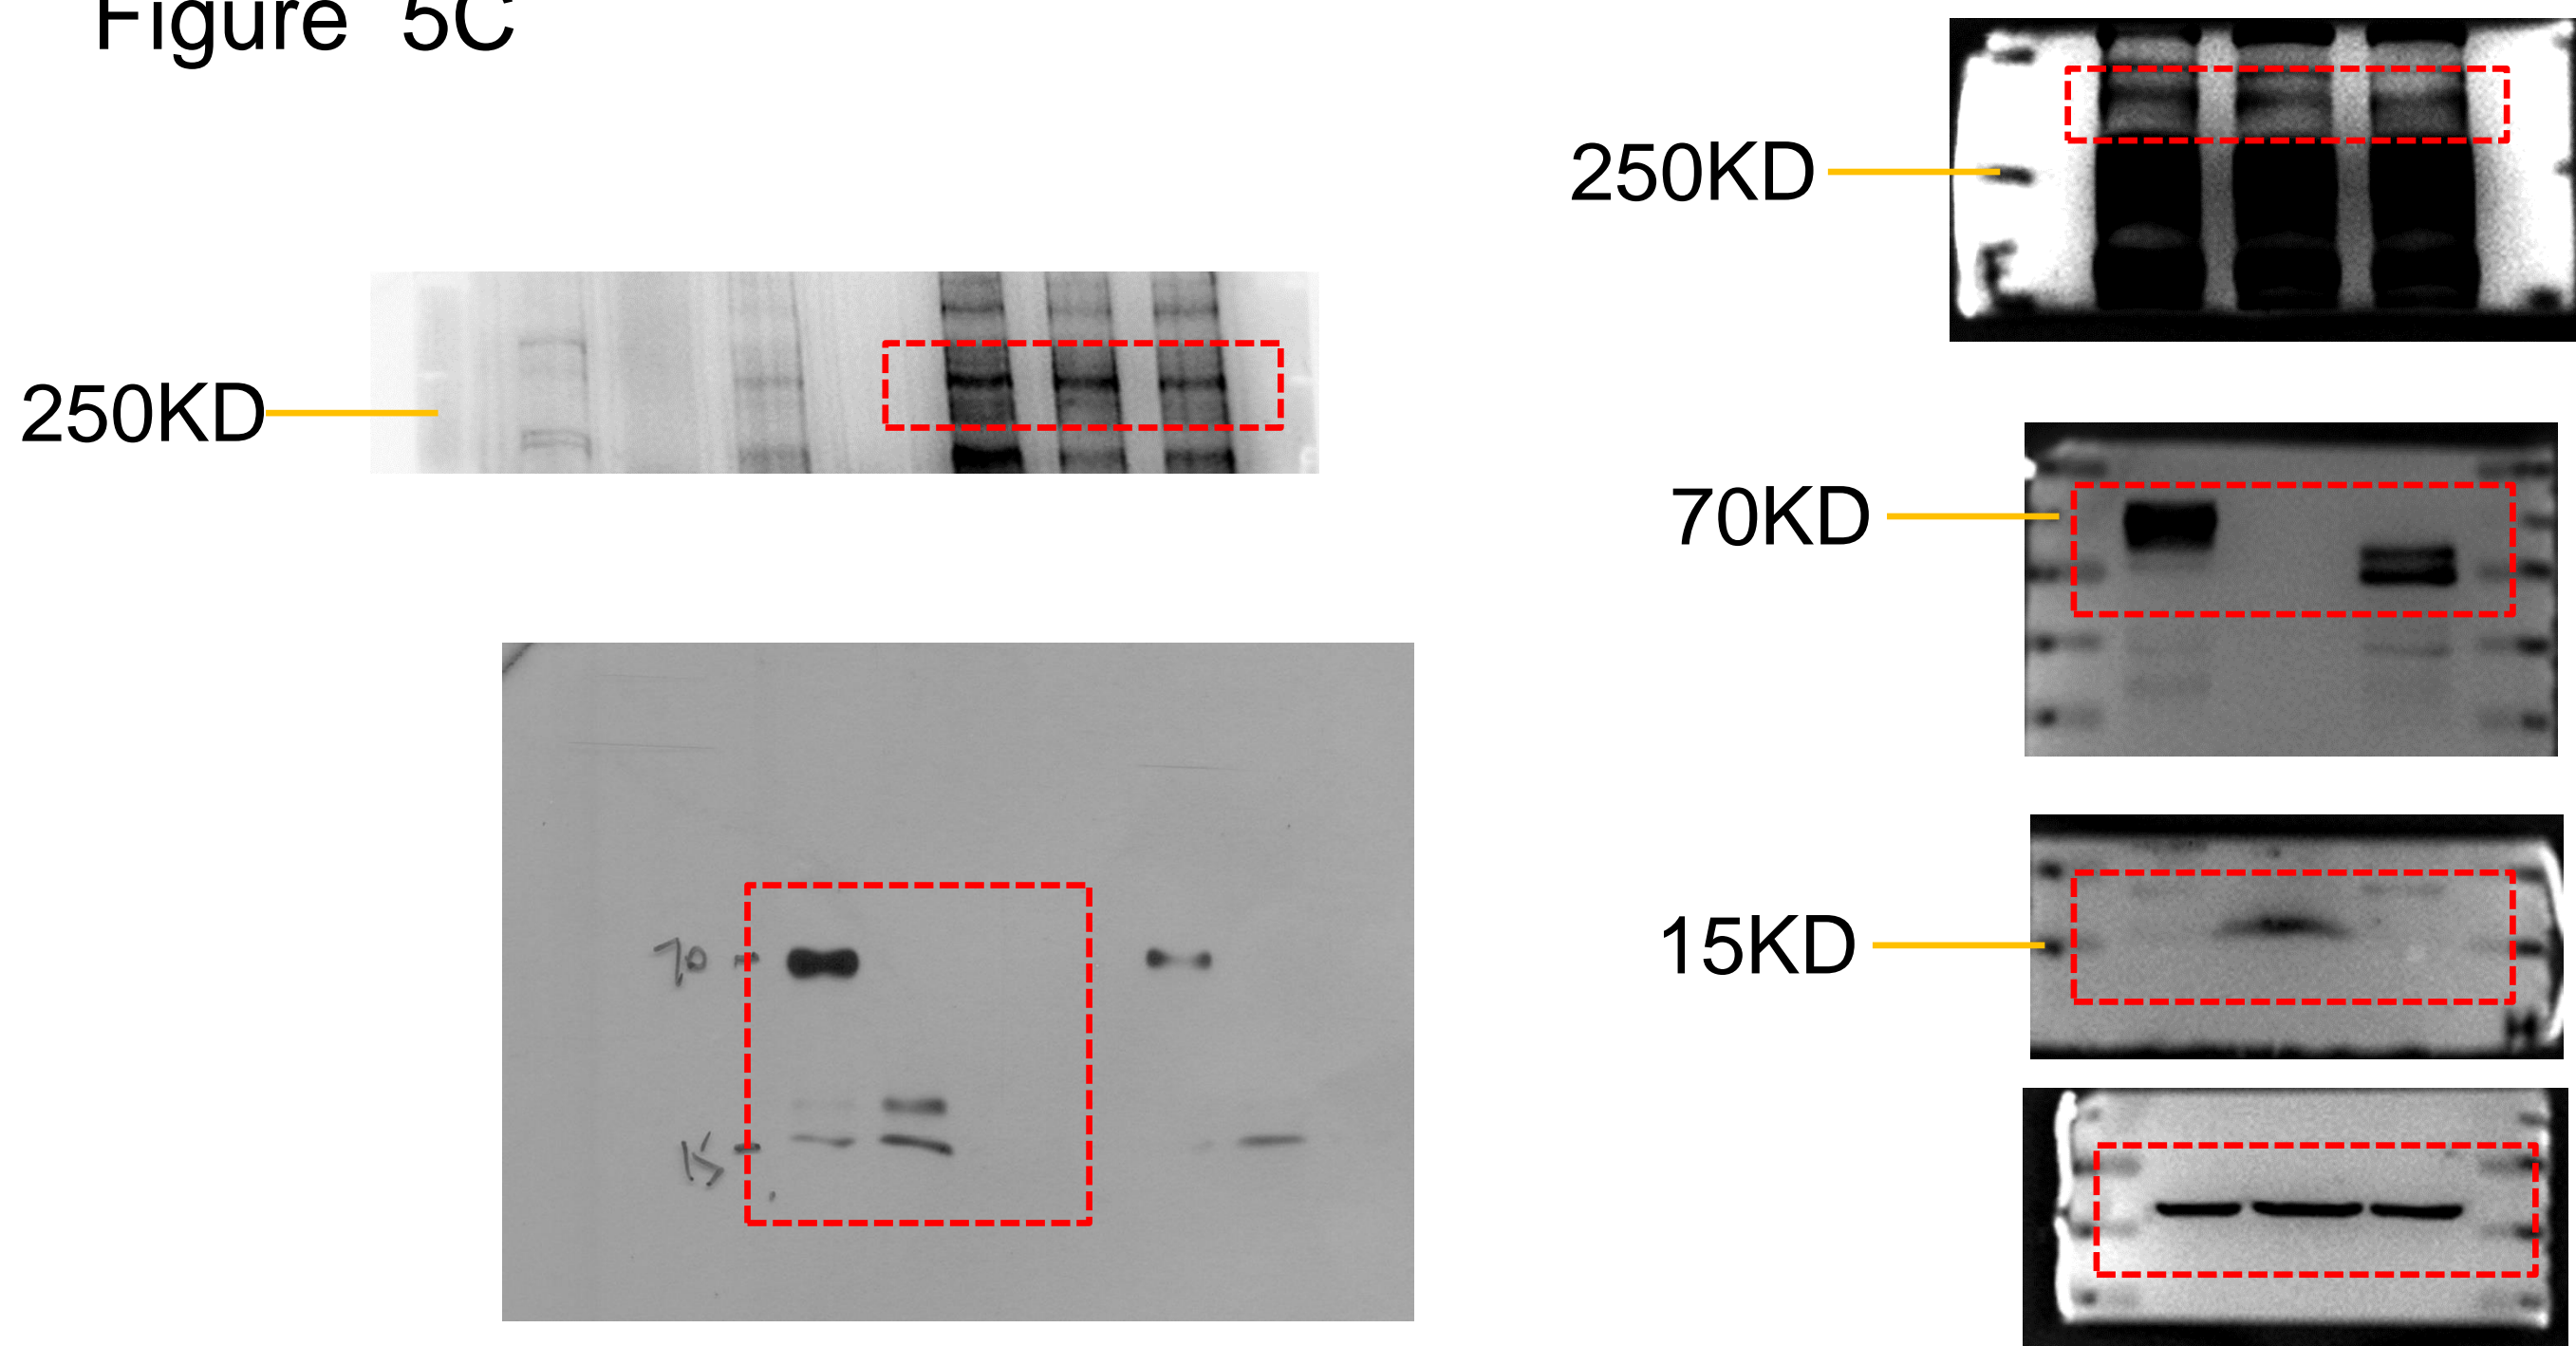



Figure 5D

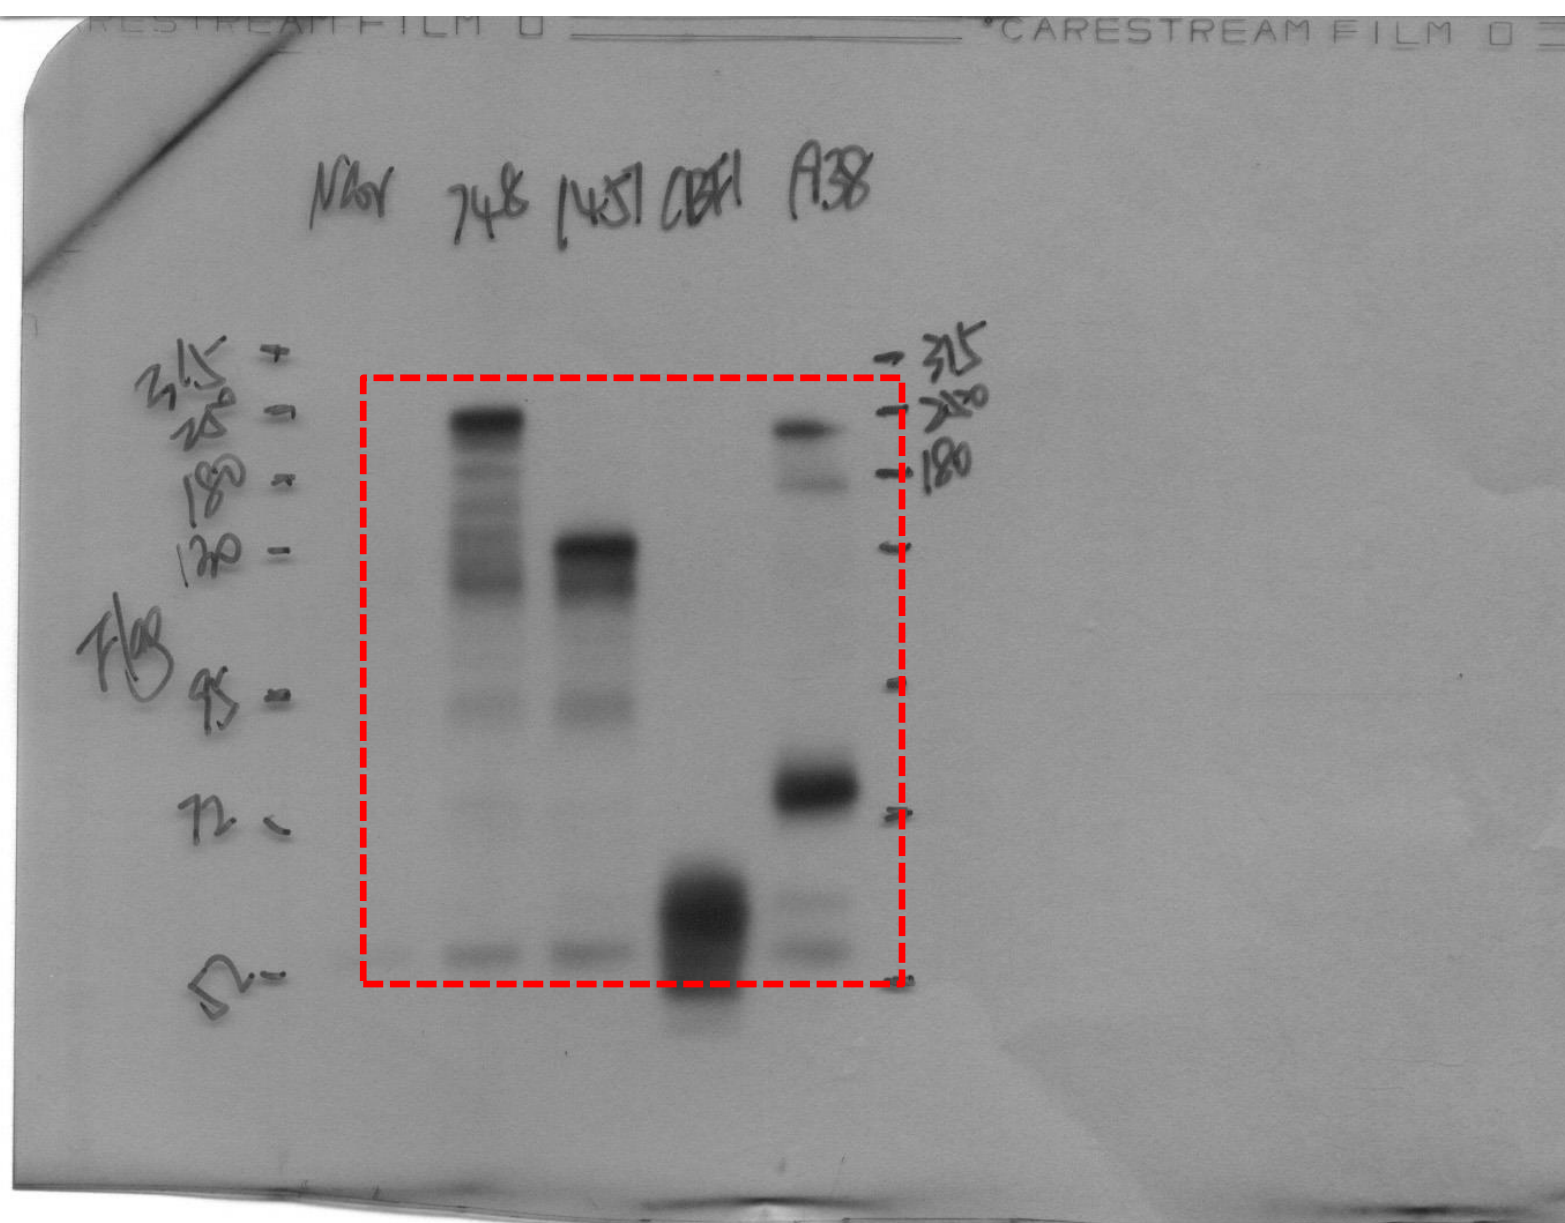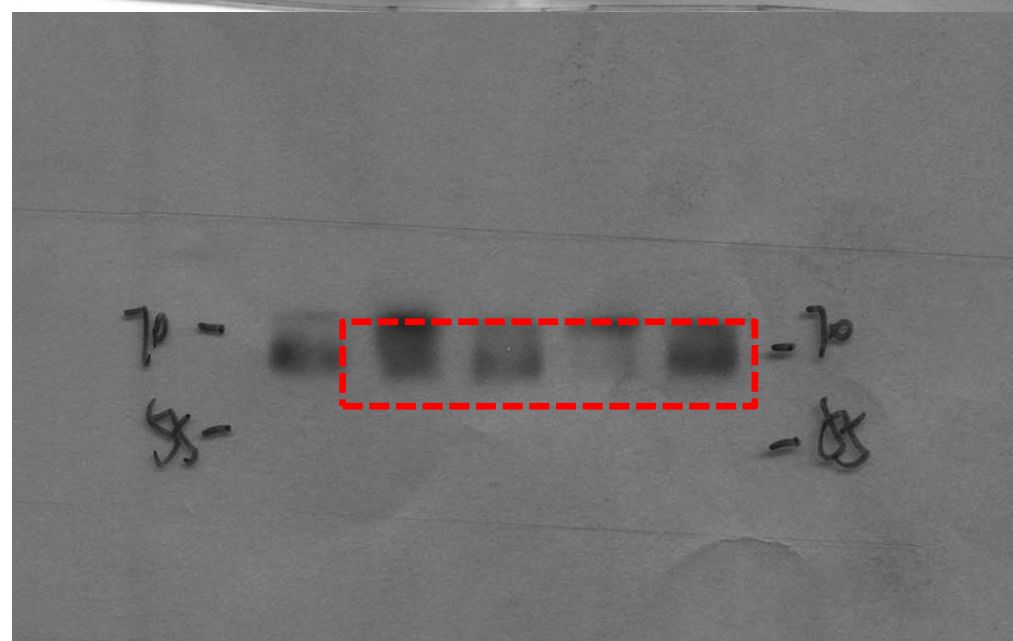

250KD

52KD

72KD

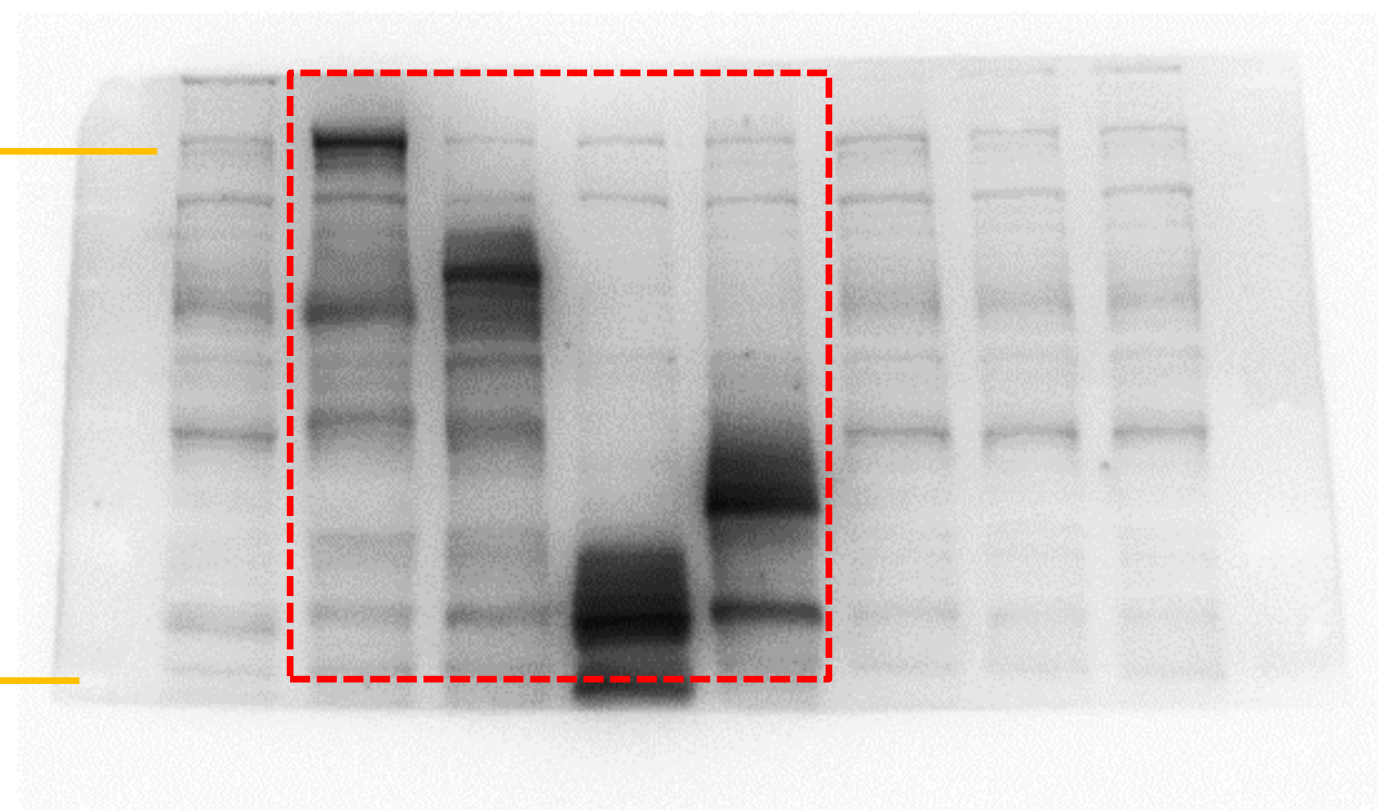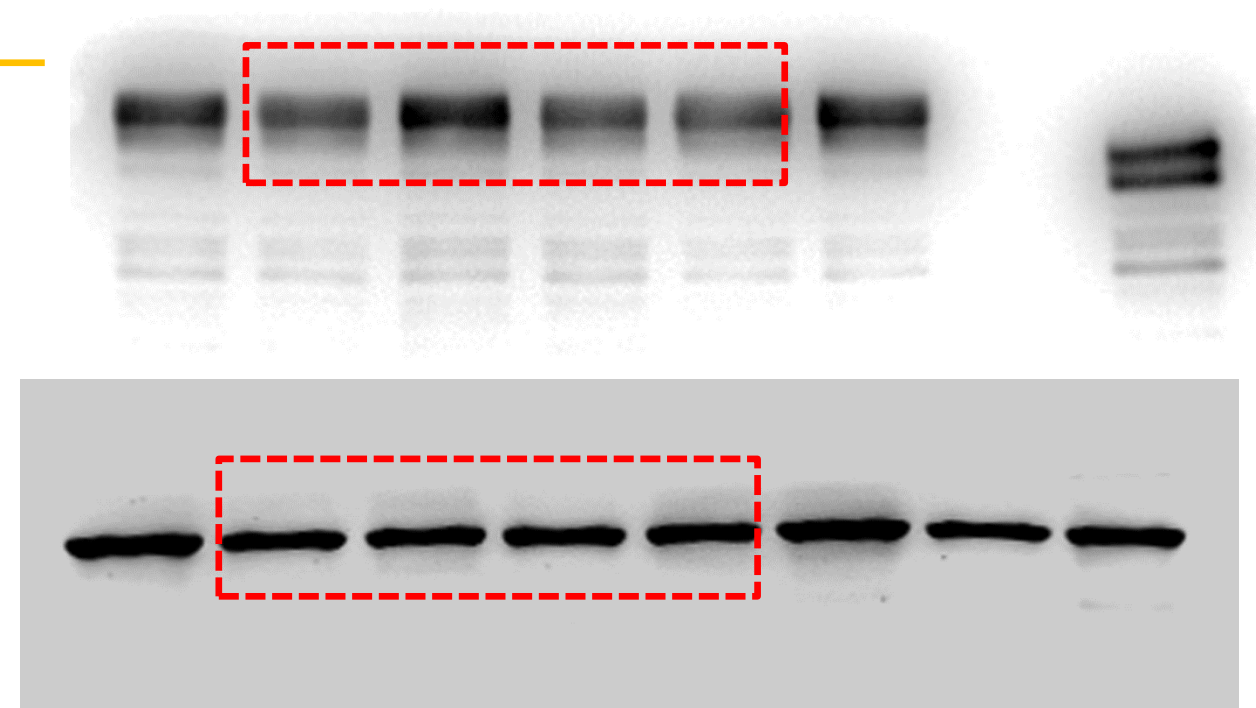

Figure 5F

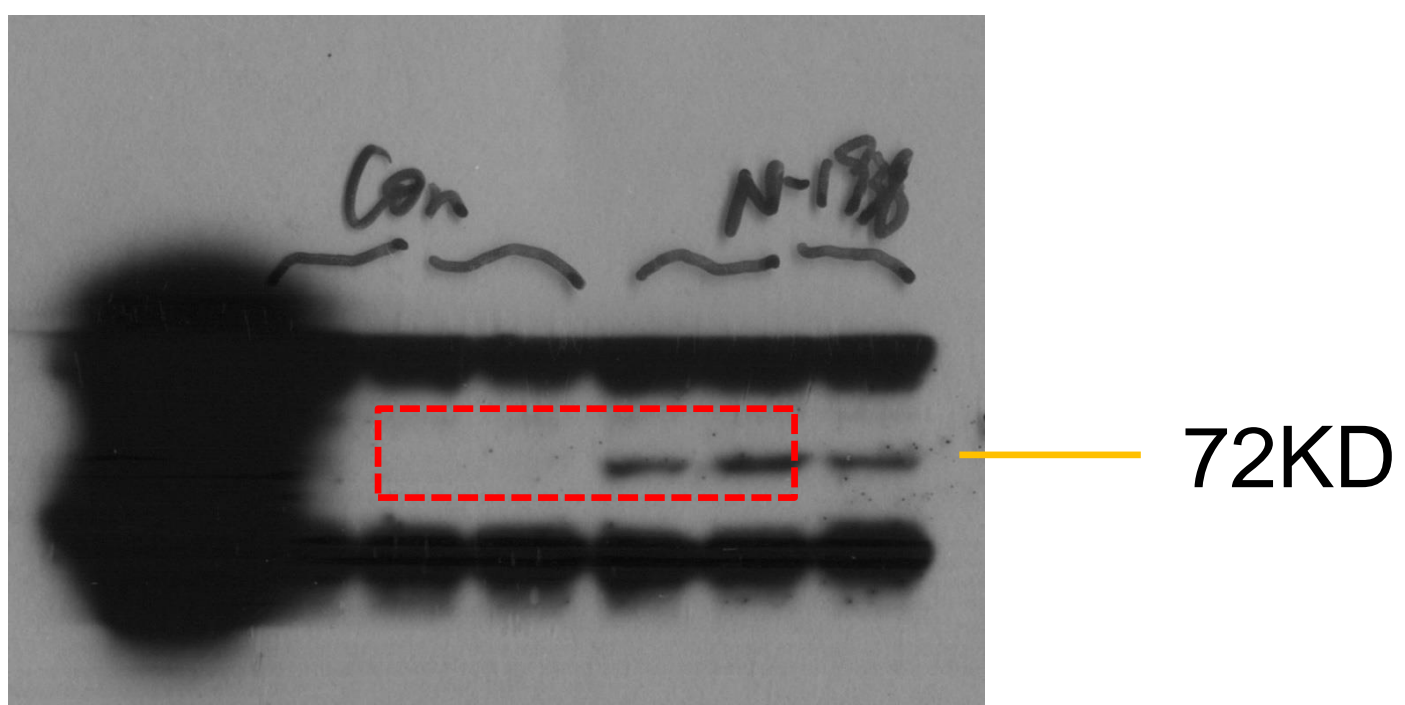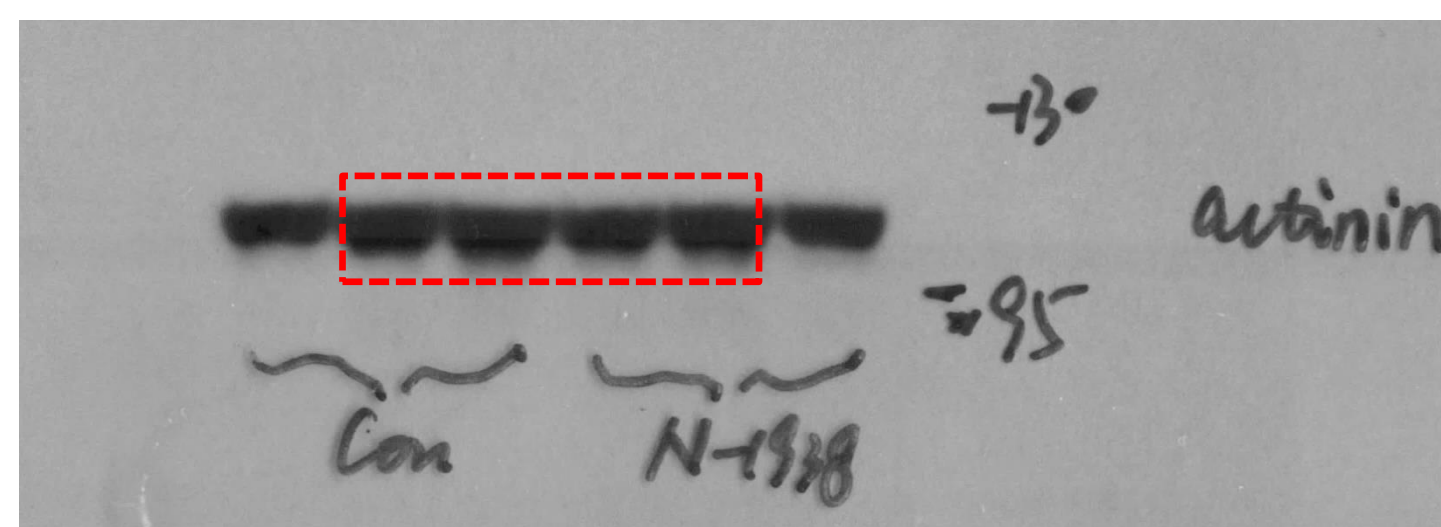

Supplement: EMMM-11-e9127-s005.pdf [file EMMM-11-e9127-s005.pdf]
